# Supplementary material for: Using Hybrid Artificial Intelligence and Evolutionary Optimization Algorithms for Estimating Soybean Yield and Fresh Biomass Using Hyperspectral Vegetation Indices
Source: MDPI journal article supplement (doi:10.3390/rs13132555), 2021-06-30
Supplement: s1 [file s1]

# Using Hybrid Artificial Intelligence and Evolutionary Optimization Algorithms for Estimating Soybean Yield and Fresh Biomass Using Hyperspectral Vegetation Indices

Mohsen Yoosefzadeh-Najafabadi,<sup>1</sup> Dan Tulpan,<sup>2</sup> and Milad Eskandari<sup>1\*</sup>

<sup>1</sup> Department of Plant Agriculture, University of Guelph, Guelph, ON N1G 2W1, Canada;  
[myoosefz@uoguelph.ca](mailto:myoosefz@uoguelph.ca) (M.Y.N.)

<sup>2</sup> Department of Animal Biosciences, University of Guelph, Guelph, ON N1G 2W1, Canada;  
[dtulpan@uoguelph.ca](mailto:dtulpan@uoguelph.ca) (D.T.)

\* Correspondence: [meskanda@uoguelph.ca](mailto:meskanda@uoguelph.ca)

**Table S1.** Tabular format of Pearson correlation analysis of hyperspectral vegetation indices (HVI), soybean seed yield, and fresh biomass (FBIO).

| Vraiables | FBIO  | Yield | S19   | S18   | S17   | S16   | S15   | S14   | S13   | S12   | S11   | S10   | S9    | S8    | S7    | S6    | S5    | S4    | S3    | S2    | S1    | RDVI  | GNDVI | NDRE  | N12   | N11   | N10   | N9    | N8    | N7    | N6    | N5    | N4    | N3    | N2    | N1    |
|-----------|-------|-------|-------|-------|-------|-------|-------|-------|-------|-------|-------|-------|-------|-------|-------|-------|-------|-------|-------|-------|-------|-------|-------|-------|-------|-------|-------|-------|-------|-------|-------|-------|-------|-------|-------|-------|
| FBIO      | 1     | 0.94  | -0.73 | -0.73 | -0.73 | -0.75 | -0.73 | 0.74  | -0.75 | -0.79 | -0.84 | -0.88 | 0.75  | -0.89 | -0.75 | -0.89 | -0.86 | -0.89 | -0.85 | -0.82 | 0.62  | -0.9  | -0.8  | -0.84 | -0.73 | -0.84 | -0.75 | -0.77 | -0.82 | -0.74 | -0.77 | -0.9  | -0.89 | -0.84 | -0.72 | -0.18 |
| Yield     | 0.94  | 1     | -0.71 | -0.71 | -0.71 | -0.73 | -0.71 | 0.71  | -0.73 | -0.76 | -0.8  | -0.84 | 0.69  | -0.84 | -0.7  | -0.84 | -0.82 | -0.84 | -0.81 | -0.78 | 0.6   | -0.84 | -0.76 | -0.79 | -0.7  | -0.79 | -0.72 | -0.73 | -0.77 | -0.71 | -0.73 | -0.84 | -0.83 | -0.79 | -0.66 | -0.15 |
| S19       | -0.73 | -0.71 | 1     | 1     | 1     | 1     | 1     | -0.99 | 1     | 0.98  | 0.94  | 0.84  | -0.38 | 0.8   | 0.4   | 0.8   | 0.81  | 0.8   | 0.92  | 0.94  | -0.83 | 0.83  | 0.95  | 0.98  | 1     | 0.97  | 0.99  | 0.98  | 0.98  | 1     | 0.98  | 0.83  | 0.81  | 0.94  | 0.43  | -0.29 |
| S18       | -0.73 | -0.71 | 1     | 1     | 1     | 1     | 1     | -1    | 1     | 0.99  | 0.94  | 0.85  | -0.39 | 0.8   | 0.41  | 0.8   | 0.82  | 0.8   | 0.93  | 0.94  | -0.83 | 0.84  | 0.95  | 0.97  | 0.99  | 0.97  | 1     | 0.99  | 0.99  | 1     | 0.99  | 0.84  | 0.82  | 0.95  | 0.44  | -0.3  |
| S17       | -0.73 | -0.71 | 1     | 1     | 1     | 1     | 1     | -0.99 | 1     | 0.98  | 0.94  | 0.84  | -0.38 | 0.8   | 0.4   | 0.8   | 0.81  | 0.8   | 0.92  | 0.94  | -0.83 | 0.83  | 0.95  | 0.98  | 1     | 0.97  | 0.99  | 0.98  | 0.98  | 1     | 0.98  | 0.83  | 0.81  | 0.94  | 0.43  | -0.29 |
| S16       | -0.75 | -0.73 | 1     | 1     | 1     | 1     | 1     | -0.99 | 1     | 0.99  | 0.96  | 0.87  | -0.42 | 0.83  | 0.44  | 0.83  | 0.84  | 0.83  | 0.94  | 0.95  | -0.83 | 0.85  | 0.96  | 0.98  | 0.99  | 0.98  | 1     | 0.99  | 0.99  | 1     | 0.99  | 0.85  | 0.84  | 0.96  | 0.46  | -0.27 |
| S15       | -0.73 | -0.71 | 1     | 1     | 1     | 1     | 1     | -0.99 | 1     | 0.98  | 0.94  | 0.84  | -0.39 | 0.8   | 0.41  | 0.8   | 0.81  | 0.8   | 0.92  | 0.94  | -0.82 | 0.83  | 0.95  | 0.98  | 1     | 0.97  | 0.99  | 0.98  | 0.98  | 0.99  | 0.98  | 0.83  | 0.81  | 0.94  | 0.43  | -0.29 |
| S14       | 0.74  | 0.71  | -0.99 | -1.00 | -0.99 | -0.99 | -0.99 | 1.00  | -0.99 | -0.98 | -0.94 | -0.85 | 0.39  | -0.80 | -0.41 | -0.80 | -0.82 | -0.80 | -0.93 | -0.94 | 0.85  | -0.84 | -0.96 | -0.98 | -0.99 | -0.97 | -1.00 | -0.99 | -0.99 | -1.00 | -0.99 | -0.84 | -0.83 | -0.95 | -0.45 | 0.32  |
| S13       | -0.75 | -0.73 | 1.00  | 1.00  | 1.00  | 1.00  | 1.00  | -0.99 | 1.00  | 0.99  | 0.96  | 0.87  | -0.42 | 0.83  | 0.44  | 0.83  | 0.84  | 0.83  | 0.94  | 0.95  | -0.83 | 0.85  | 0.96  | 0.98  | 0.99  | 0.98  | 1.00  | 0.99  | 0.99  | 1.00  | 0.99  | 0.85  | 0.84  | 0.96  | 0.46  | -0.27 |
| S12       | -0.79 | -0.76 | 0.98  | 0.99  | 0.98  | 0.99  | 0.98  | -0.98 | 0.99  | 1.00  | 0.98  | 0.91  | -0.50 | 0.88  | 0.52  | 0.88  | 0.89  | 0.88  | 0.97  | 0.98  | -0.84 | 0.90  | 0.98  | 0.98  | 0.97  | 0.98  | 0.99  | 0.99  | 0.99  | 0.99  | 0.99  | 0.90  | 0.89  | 0.97  | 0.53  | -0.22 |
| S11       | -0.84 | -0.80 | 0.94  | 0.94  | 0.94  | 0.96  | 0.94  | -0.94 | 0.96  | 0.98  | 1.00  | 0.97  | -0.65 | 0.94  | 0.66  | 0.94  | 0.96  | 0.94  | 0.99  | 0.99  | -0.81 | 0.95  | 0.98  | 0.96  | 0.92  | 0.96  | 0.96  | 0.97  | 0.97  | 0.95  | 0.97  | 0.95  | 0.95  | 0.98  | 0.64  | -0.08 |
| S10       | -0.88 | -0.84 | 0.84  | 0.85  | 0.84  | 0.87  | 0.84  | -0.85 | 0.87  | 0.91  | 0.97  | 1.00  | -0.81 | 1.00  | 0.82  | 0.99  | 0.99  | 0.99  | 0.97  | 0.95  | -0.72 | 0.99  | 0.93  | 0.91  | 0.83  | 0.91  | 0.87  | 0.89  | 0.91  | 0.86  | 0.89  | 0.99  | 0.99  | 0.94  | 0.76  | 0.14  |
| S9        | 0.75  | 0.69  | -0.38 | -0.39 | -0.38 | -0.42 | -0.39 | 0.39  | -0.42 | -0.50 | -0.65 | -0.81 | 1.00  | -0.85 | -1.00 | -0.85 | -0.82 | -0.85 | -0.67 | -0.62 | 0.33  | -0.82 | -0.57 | -0.54 | -0.37 | -0.54 | -0.42 | -0.46 | -0.51 | -0.41 | -0.46 | -0.82 | -0.84 | -0.61 | -0.85 | -0.62 |
| S8        | -0.89 | -0.84 | 0.80  | 0.80  | 0.80  | 0.83  | 0.80  | -0.80 | 0.83  | 0.88  | 0.94  | 1.00  | -0.85 | 1.00  | 0.87  | 1.00  | 0.99  | 1.00  | 0.95  | 0.93  | -0.68 | 0.99  | 0.90  | 0.89  | 0.79  | 0.88  | 0.82  | 0.85  | 0.87  | 0.81  | 0.85  | 0.99  | 0.99  | 0.92  | 0.78  | 0.22  |
| S7        | -0.75 | -0.70 | 0.40  | 0.41  | 0.40  | 0.44  | 0.41  | -0.41 | 0.44  | 0.52  | 0.66  | 0.82  | -1.00 | 0.87  | 1.00  | 0.86  | 0.83  | 0.86  | 0.68  | 0.64  | -0.36 | 0.83  | 0.59  | 0.55  | 0.39  | 0.55  | 0.44  | 0.48  | 0.52  | 0.42  | 0.48  | 0.83  | 0.84  | 0.63  | 0.85  | 0.60  |
| S6        | -0.89 | -0.84 | 0.80  | 0.80  | 0.80  | 0.83  | 0.80  | -0.80 | 0.83  | 0.88  | 0.94  | 0.99  | -0.85 | 1.00  | 0.86  | 1.00  | 0.99  | 1.00  | 0.95  | 0.93  | -0.69 | 0.98  | 0.90  | 0.89  | 0.79  | 0.89  | 0.82  | 0.85  | 0.87  | 0.81  | 0.85  | 0.98  | 0.99  | 0.92  | 0.77  | 0.22  |
| S5        | -0.86 | -0.82 | 0.81  | 0.82  | 0.81  | 0.84  | 0.81  | -0.82 | 0.84  | 0.89  | 0.96  | 0.99  | -0.82 | 0.99  | 0.83  | 0.99  | 1.00  | 0.99  | 0.96  | 0.95  | -0.74 | 0.98  | 0.93  | 0.88  | 0.80  | 0.89  | 0.84  | 0.87  | 0.88  | 0.83  | 0.87  | 0.98  | 0.99  | 0.94  | 0.72  | 0.14  |
| S4        | -0.89 | -0.84 | 0.80  | 0.80  | 0.80  | 0.83  | 0.80  | -0.80 | 0.83  | 0.88  | 0.94  | 0.99  | -0.85 | 1.00  | 0.86  | 1.00  | 0.99  | 1.00  | 0.95  | 0.93  | -0.69 | 0.98  | 0.90  | 0.89  | 0.79  | 0.89  | 0.82  | 0.85  | 0.87  | 0.81  | 0.85  | 0.98  | 0.99  | 0.92  | 0.77  | 0.22  |
| S3        | -0.85 | -0.81 | 0.92  | 0.93  | 0.92  | 0.94  | 0.92  | -0.93 | 0.94  | 0.97  | 0.99  | 0.97  | -0.67 | 0.95  | 0.68  | 0.95  | 0.96  | 0.95  | 1.00  | 1.00  | -0.77 | 0.96  | 0.98  | 0.96  | 0.91  | 0.97  | 0.94  | 0.95  | 0.96  | 0.93  | 0.95  | 0.96  | 0.95  | 0.99  | 0.59  | -0.02 |
| S2        | -0.82 | -0.78 | 0.94  | 0.94  | 0.94  | 0.95  | 0.94  | -0.94 | 0.95  | 0.98  | 0.99  | 0.95  | -0.62 | 0.93  | 0.64  | 0.93  | 0.95  | 0.93  | 1.00  | 1.00  | -0.80 | 0.94  | 0.99  | 0.96  | 0.93  | 0.97  | 0.95  | 0.96  | 0.96  | 0.95  | 0.96  | 0.94  | 0.93  | 0.99  | 0.55  | -0.09 |
| S1        | 0.62  | 0.60  | -0.83 | -0.83 | -0.83 | -0.83 | -0.82 | 0.85  | -0.83 | -0.84 | -0.81 | -0.72 | 0.33  | -0.68 | -0.36 | -0.69 | -0.74 | -0.69 | -0.77 | -0.80 | 1.00  | -0.72 | -0.83 | -0.81 | -0.83 | -0.80 | -0.85 | -0.86 | -0.83 | -0.85 | -0.86 | -0.72 | -0.73 | -0.82 | -0.46 | 0.41  |
| RDVI      | -0.90 | -0.84 | 0.83  | 0.84  | 0.83  | 0.85  | 0.83  | -0.84 | 0.85  | 0.90  | 0.95  | 0.99  | -0.82 | 0.99  | 0.83  | 0.98  | 0.98  | 0.98  | 0.96  | 0.94  | -0.72 | 1.00  | 0.93  | 0.92  | 0.82  | 0.91  | 0.86  | 0.88  | 0.91  | 0.85  | 0.88  | 1.00  | 1.00  | 0.95  | 0.76  | 0.15  |
| GNDVI     | -0.80 | -0.76 | 0.95  | 0.95  | 0.95  | 0.96  | 0.95  | -0.96 | 0.96  | 0.98  | 0.98  | 0.93  | -0.57 | 0.90  | 0.59  | 0.90  | 0.93  | 0.90  | 0.98  | 0.99  | -0.83 | 0.93  | 1.00  | 0.97  | 0.94  | 0.97  | 0.97  | 0.98  | 0.98  | 0.97  | 0.98  | 0.93  | 0.92  | 1.00  | 0.52  | -0.16 |
| NDRE      | -0.84 | -0.79 | 0.98  | 0.97  | 0.98  | 0.98  | 0.98  | -0.98 | 0.98  | 0.98  | 0.96  | 0.91  | -0.54 | 0.89  | 0.55  | 0.89  | 0.88  | 0.89  | 0.96  | 0.96  | -0.81 | 0.92  | 0.97  | 1.00  | 0.97  | 1.00  | 0.98  | 0.98  | 1.00  | 0.98  | 0.98  | 0.92  | 0.90  | 0.98  | 0.54  | -0.14 |
| N12       | -0.73 | -0.70 | 1.00  | 0.99  | 1.00  | 0.99  | 1.00  | -0.99 | 0.99  | 0.97  | 0.92  | 0.83  | -0.37 | 0.79  | 0.39  | 0.79  | 0.80  | 0.79  | 0.91  | 0.93  | -0.83 | 0.82  | 0.94  | 0.97  | 1.00  | 0.97  | 0.98  | 0.98  | 0.98  | 0.99  | 0.98  | 0.82  | 0.80  | 0.93  | 0.42  | -0.30 |
| N11       | -0.84 | -0.79 | 0.97  | 0.97  | 0.97  | 0.98  | 0.97  | -0.97 | 0.98  | 0.98  | 0.96  | 0.91  | -0.54 | 0.88  | 0.55  | 0.89  | 0.89  | 0.89  | 0.97  | 0.97  | -0.80 | 0.91  | 0.97  | 1.00  | 0.97  | 1.00  | 0.97  | 0.97  | 0.99  | 0.97  | 0.97  | 0.91  | 0.90  | 0.98  | 0.52  | -0.12 |
| N10       | -0.75 | -0.72 | 0.99  | 1.00  | 0.99  | 1.00  | 0.99  | -1.00 | 1.00  | 0.99  | 0.96  | 0.87  | -0.42 | 0.82  | 0.44  | 0.82  | 0.84  | 0.82  | 0.94  | 0.95  | -0.85 | 0.86  | 0.97  | 0.98  | 0.98  | 0.97  | 1.00  | 1.00  | 0.99  | 1.00  | 1.00  | 0.86  | 0.84  | 0.96  | 0.47  | -0.30 |
| N9        | -0.77 | -0.73 | 0.98  | 0.99  | 0.98  | 0.99  | 0.98  | -0.99 | 0.99  | 0.99  | 0.97  | 0.89  | -0.46 | 0.85  | 0.48  | 0.85  | 0.87  | 0.85  | 0.95  | 0.96  | -0.86 | 0.88  | 0.98  | 0.98  | 0.98  | 0.97  | 1.00  | 1.00  | 0.99  | 1.00  | 1.00  | 0.88  | 0.87  | 0.97  | 0.51  | -0.27 |
| N8        | -0.82 | -0.77 | 0.98  | 0.99  | 0.98  | 0.99  | 0.98  | -0.99 | 0.99  | 0.99  | 0.97  | 0.91  | -0.51 | 0.87  | 0.52  | 0.87  | 0.88  | 0.87  | 0.96  | 0.96  | -0.83 | 0.91  | 0.98  | 1.00  | 0.98  | 0.99  | 0.99  | 0.99  | 1.00  | 0.99  | 0.99  | 0.91  | 0.89  | 0.98  | 0.53  | -0.20 |
| N7        | -0.74 | -0.71 | 1.00  | 1.00  | 1.00  | 1.00  | 0.99  | -1.00 | 1.00  | 0.99  | 0.95  | 0.86  | -0.41 | 0.81  | 0.42  | 0.81  | 0.83  | 0.81  | 0.93  | 0.95  | -0.85 | 0.85  | 0.97  | 0.98  | 0.99  | 0.97  | 1.00  | 1.00  | 0.99  | 1.00  | 1.00  | 0.85  | 0.83  | 0.96  | 0.46  | -0.30 |
| N6        | -0.77 | -0.73 | 0.98  | 0.99  | 0.98  | 0.99  | 0.98  | -0.99 | 0.99  | 0.99  | 0.97  | 0.89  | -0.46 | 0.85  | 0.48  | 0.85  | 0.87  | 0.85  | 0.95  | 0.96  | -0.86 | 0.88  | 0.98  | 0.98  | 0.98  | 0.97  | 1.00  | 1.00  | 0.99  | 1.00  | 1.00  | 0.88  | 0.87  | 0.97  | 0.51  | -0.27 |
| N5        | -0.90 | -0.84 | 0.83  | 0.84  | 0.83  | 0.85  | 0.83  | -0.84 | 0.85  | 0.90  | 0.95  | 0.99  | -0.82 | 0.99  | 0.83  | 0.98  | 0.98  | 0.98  | 0.96  | 0.94  | -0.72 | 1.00  | 0.93  | 0.92  | 0.82  | 0.91  | 0.86  | 0.88  | 0.91  | 0.85  | 0.88  | 1.00  | 1.00  | 0.95  | 0.76  | 0.15  |
| N4        | -0.89 | -0.83 | 0.81  | 0.82  | 0.81  | 0.84  | 0.81  | -0.83 | 0.84  | 0.89  | 0.95  | 0.99  | -0.84 | 0.99  | 0.84  | 0.99  | 0.99  | 0.99  | 0.95  | 0.93  | -0.73 | 1.00  | 0.92  | 0.90  | 0.80  | 0.90  | 0.84  | 0.87  | 0.89  | 0.83  | 0.87  | 1.00  | 1.00  | 0.94  | 0.77  | 0.17  |
| N3        | -0.84 | -0.79 | 0.94  | 0.95  | 0.94  | 0.96  | 0.94  | -0.95 | 0.96  | 0.97  | 0.98  | 0.94  | -0.61 | 0.92  | 0.63  | 0.92  | 0.94  | 0.92  | 0.99  | 0.99  | -0.82 | 0.95  | 1.00  | 0.98  | 0.93  | 0.98  | 0.96  | 0.97  | 0.98  | 0.96  | 0.97  | 0.95  | 0.94  | 1.00  | 0.56  | -0.11 |
| N2        | -0.72 | -0.66 | 0.43  | 0.44  | 0.43  | 0.46  | 0.43  | -0.45 | 0.46  | 0.53  | 0.64  | 0.76  | -0.85 | 0.78  | 0.85  | 0.77  | 0.72  | 0.77  | 0.59  | 0.55  | -0.46 | 0.76  | 0.52  | 0.54  | 0.42  | 0.52  | 0.47  | 0.51  | 0.53  | 0.46  | 0.51  | 0.76  | 0.77  | 0.56  | 1.00  | 0.37  |
| N1        | -0.18 | -0.15 | -0.29 | -0.30 | -0.29 | -0.27 | -0.29 | 0.32  | -0.27 | -0.22 | -0.08 | 0.14  | -0.62 | 0.22  | 0.60  | 0.22  | 0.14  | 0.22  | -0.02 | -0.09 | 0.41  | 0.15  | -0.16 | -0.14 | -0.30 | -0.12 | -0.30 | -0.27 | -0.20 | -0.30 | -0.27 | 0.15  | 0.17  | -0.11 | 0.37  | 1.00  |

**Table S2.** Analysis performance of random forest (RF), radial basis function (RBF), and support vector regression (SVR) algorithms for soybean yield prediction using yield component traits.

| Algorithm | MAE (Kg.ha <sup>-1</sup> ) | RMSE (Kg.ha <sup>-1</sup> ) | Coefficient of determination (R <sup>2</sup> ) |
|-----------|----------------------------|-----------------------------|------------------------------------------------|
| RF        | 194.4164392                | 264.3694044                 | 0.851041562                                    |
| RF        | 153.6659487                | 225.8010471                 | 0.868714008                                    |
| RF        | 196.0085792                | 255.6093528                 | 0.825276419                                    |
| RF        | 128.2046264                | 162.9308531                 | 0.898963613                                    |
| RF        | 190.9728488                | 292.831912                  | 0.771887352                                    |
| RF        | 161.2443396                | 206.7116935                 | 0.880600038                                    |
| RF        | 237.3928162                | 378.5903199                 | 0.786487711                                    |
| RF        | 174.5036521                | 230.900251                  | 0.870352877                                    |
| RF        | 167.7280337                | 228.6508868                 | 0.821401288                                    |
| RF        | 156.1771348                | 219.7076022                 | 0.8658249                                      |
| RF        | 152.5430389                | 228.1215753                 | 0.852017326                                    |
| RF        | 195.607481                 | 266.2181885                 | 0.821569354                                    |
| RF        | 196.9190055                | 324.9220828                 | 0.81987753                                     |
| RF        | 199.3637476                | 255.9968455                 | 0.820151912                                    |
| RF        | 176.6348179                | 249.9933007                 | 0.807212658                                    |
| RF        | 164.6068529                | 233.8554832                 | 0.841945295                                    |
| RF        | 197.7039414                | 253.489436                  | 0.801026804                                    |
| RF        | 176.9438476                | 297.3525796                 | 0.795019998                                    |
| RF        | 162.9480293                | 262.3442671                 | 0.860342859                                    |
| RF        | 149.6396158                | 189.241463                  | 0.884526328                                    |
| RF        | 165.5872226                | 210.4387478                 | 0.841994732                                    |
| RF        | 214.2586298                | 331.5895186                 | 0.777967825                                    |
| RF        | 140.8431341                | 193.2645868                 | 0.917992395                                    |
| RF        | 177.3601749                | 246.9138108                 | 0.833648229                                    |
| RF        | 187.8457237                | 258.4256551                 | 0.820404094                                    |
| RF        | 173.4347837                | 225.0137528                 | 0.885411206                                    |
| RF        | 172.26188                  | 246.0583511                 | 0.853459052                                    |
| RF        | 137.8932001                | 181.087718                  | 0.865382502                                    |
| RF        | 144.5719989                | 216.6240212                 | 0.878340108                                    |
| RF        | 230.0856937                | 345.8972946                 | 0.767554612                                    |
| RF        | 203.8437002                | 288.4935979                 | 0.820017696                                    |
| RF        | 159.8103711                | 204.2963386                 | 0.882240097                                    |
| RF        | 147.2445154                | 208.7225649                 | 0.868152667                                    |
| RF        | 190.816143                 | 316.930276                  | 0.801753073                                    |
| RF        | 159.0294133                | 199.275656                  | 0.851906349                                    |
| RF        | 187.0878757                | 254.7363732                 | 0.791581404                                    |
| RF        | 169.7205721                | 236.6627781                 | 0.80833428                                     |
| RF        | 150.2662134                | 186.5224665                 | 0.889374882                                    |
| RF        | 169.5110898                | 234.2206669                 | 0.871887243                                    |
| RF        | 211.0291434                | 321.450775                  | 0.795012935                                    |

|     |             |             |             |
|-----|-------------|-------------|-------------|
| RF  | 147.178802  | 208.1800056 | 0.846933853 |
| RF  | 160.1442493 | 213.4685974 | 0.881260499 |
| RF  | 158.9773195 | 216.8433078 | 0.88888212  |
| RF  | 176.2874827 | 254.0229866 | 0.798749809 |
| RF  | 212.6379021 | 309.14105   | 0.816370719 |
| RF  | 191.7389196 | 258.0168978 | 0.84423525  |
| RF  | 185.521718  | 298.2415012 | 0.769271068 |
| RF  | 163.5115468 | 237.5566316 | 0.827595832 |
| RF  | 149.2701387 | 195.7500659 | 0.869894049 |
| RF  | 159.155492  | 230.8599248 | 0.878819171 |
| RBF | 166.482403  | 228.1225591 | 0.895936303 |
| RBF | 141.8539799 | 209.7292324 | 0.88755794  |
| RBF | 177.4770866 | 244.498738  | 0.82952697  |
| RBF | 124.4508702 | 159.3585312 | 0.89595357  |
| RBF | 171.7851253 | 284.0133451 | 0.786188535 |
| RBF | 151.7472256 | 199.2448359 | 0.889020262 |
| RBF | 191.3819275 | 332.3332549 | 0.843649759 |
| RBF | 156.3124725 | 217.4039771 | 0.875875273 |
| RBF | 151.2263493 | 194.6464191 | 0.870931493 |
| RBF | 161.1456794 | 250.2351497 | 0.819443301 |
| RBF | 140.899325  | 199.494637  | 0.891653504 |
| RBF | 166.5171916 | 237.9066547 | 0.861616795 |
| RBF | 174.9630045 | 298.9875977 | 0.865127154 |
| RBF | 161.806343  | 204.3550293 | 0.894761192 |
| RBF | 179.6671577 | 265.7072244 | 0.773685629 |
| RBF | 134.2890418 | 185.6078136 | 0.898262776 |
| RBF | 168.361031  | 213.8865503 | 0.855724035 |
| RBF | 158.4137791 | 264.0797234 | 0.841063207 |
| RBF | 184.1080335 | 319.0615869 | 0.781863737 |
| RBF | 138.1787432 | 172.1319603 | 0.906035473 |
| RBF | 152.0514538 | 193.1760534 | 0.867119796 |
| RBF | 194.512439  | 322.1013565 | 0.794374653 |
| RBF | 120.8858254 | 177.1896796 | 0.939188454 |
| RBF | 162.7073572 | 219.3045294 | 0.867315056 |
| RBF | 148.6239503 | 193.105992  | 0.899124255 |
| RBF | 173.313671  | 258.5462006 | 0.846279147 |
| RBF | 158.3618457 | 216.1436186 | 0.863422465 |
| RBF | 127.727618  | 171.1289184 | 0.880682997 |
| RBF | 138.5087609 | 204.2425557 | 0.892393716 |
| RBF | 196.2541738 | 313.6464364 | 0.811598164 |
| RBF | 205.8598625 | 302.3590182 | 0.788980354 |
| RBF | 145.7107933 | 184.4297027 | 0.891108606 |
| RBF | 136.1508379 | 183.6820335 | 0.899823637 |

|     |             |             |             |
|-----|-------------|-------------|-------------|
| RBF | 160.0521048 | 285.9294767 | 0.855288111 |
| RBF | 156.3711753 | 205.2928041 | 0.846959883 |
| RBF | 170.555398  | 232.3567345 | 0.818863266 |
| RBF | 147.6561911 | 193.3014557 | 0.876408845 |
| RBF | 137.9913619 | 184.7867974 | 0.898873668 |
| RBF | 155.1976974 | 236.2798182 | 0.87229602  |
| RBF | 213.0368675 | 323.5050865 | 0.792917032 |
| RBF | 144.3900282 | 232.0029736 | 0.809041754 |
| RBF | 156.9787925 | 207.3934681 | 0.885506922 |
| RBF | 152.2256617 | 215.5828163 | 0.886302241 |
| RBF | 162.1911342 | 232.7485089 | 0.833034657 |
| RBF | 183.7689879 | 284.8704314 | 0.858339365 |
| RBF | 170.7591561 | 266.4940022 | 0.844392614 |
| RBF | 177.8848472 | 294.979878  | 0.776937776 |
| RBF | 152.0130877 | 203.8784441 | 0.867692657 |
| RBF | 130.3557598 | 184.9497011 | 0.883528797 |
| RBF | 149.8517638 | 207.0613214 | 0.907388731 |
| SVR | 169.3193869 | 254.1831811 | 0.885709051 |
| SVR | 143.898444  | 240.3086238 | 0.864607456 |
| SVR | 142.4505225 | 206.9095853 | 0.87389928  |
| SVR | 114.4171545 | 144.973302  | 0.924872394 |
| SVR | 166.8015806 | 284.2797896 | 0.797220479 |
| SVR | 153.5666945 | 216.5995898 | 0.876691842 |
| SVR | 193.1655022 | 370.7254871 | 0.827227033 |
| SVR | 145.0688545 | 195.9714909 | 0.88310517  |
| SVR | 136.4520851 | 156.2586138 | 0.900808865 |
| SVR | 121.9551875 | 188.203529  | 0.922553602 |
| SVR | 124.3239525 | 167.8495522 | 0.90322418  |
| SVR | 156.5492272 | 248.6340724 | 0.863947409 |
| SVR | 195.5975833 | 337.4621718 | 0.822087889 |
| SVR | 143.1263626 | 189.1334368 | 0.919921051 |
| SVR | 135.6829301 | 199.0177349 | 0.870698029 |
| SVR | 136.1574023 | 198.3776151 | 0.891903584 |
| SVR | 141.7515528 | 187.6667512 | 0.889041454 |
| SVR | 158.7693144 | 280.4770581 | 0.827082577 |
| SVR | 177.7295967 | 305.6477374 | 0.817503223 |
| SVR | 133.7576242 | 173.0237627 | 0.909123355 |
| SVR | 139.1392941 | 184.7319337 | 0.853130677 |
| SVR | 176.753526  | 322.1107671 | 0.820168626 |
| SVR | 147.404754  | 223.3131383 | 0.920919747 |
| SVR | 131.2783698 | 207.6305114 | 0.885816755 |
| SVR | 142.6487192 | 200.9875299 | 0.904211457 |
| SVR | 162.7484641 | 234.0043982 | 0.889078699 |

|     |             |             |             |
|-----|-------------|-------------|-------------|
| SVR | 132.0442351 | 173.6694425 | 0.893865214 |
| SVR | 108.1486884 | 133.1067669 | 0.919326768 |
| SVR | 146.1375347 | 243.512773  | 0.857081408 |
| SVR | 183.566601  | 330.771371  | 0.820460837 |
| SVR | 170.727708  | 270.4687548 | 0.846223367 |
| SVR | 139.5506019 | 171.9184397 | 0.902174143 |
| SVR | 137.2469409 | 189.3853443 | 0.911677959 |
| SVR | 164.9731378 | 312.6570646 | 0.836422846 |
| SVR | 126.275367  | 189.2158338 | 0.866987442 |
| SVR | 155.070386  | 232.0514709 | 0.801329204 |
| SVR | 111.3052048 | 164.7640341 | 0.918301307 |
| SVR | 127.1567767 | 169.4266582 | 0.912551468 |
| SVR | 145.8161745 | 214.4679096 | 0.924900433 |
| SVR | 194.4827625 | 333.1412181 | 0.803457764 |
| SVR | 131.0953209 | 193.3740054 | 0.870683683 |
| SVR | 142.4606988 | 189.964346  | 0.902140386 |
| SVR | 160.7865427 | 251.4286331 | 0.869249999 |
| SVR | 131.2447093 | 212.147326  | 0.842390416 |
| SVR | 175.7521504 | 300.192103  | 0.861305686 |
| SVR | 152.4749077 | 232.9133883 | 0.902423577 |
| SVR | 158.2806367 | 279.7614942 | 0.808935637 |
| SVR | 145.2068802 | 198.8333128 | 0.877670785 |
| SVR | 134.5474211 | 210.7963702 | 0.853422246 |
| SVR | 140.6517059 | 225.3313258 | 0.903992522 |

---

Coefficient of determination ( $R^2$ ), the Root Mean Square Error (RMSE) and the Mean Absolute Errors (MAE)

**Table S3.** Analysis performance of random forest (RF), radial basis function (RBF), and support vector regression (SVR) algorithms for soybean fresh biomass (FBIO) prediction using yield component traits.

| Algorithm | MAE (g m <sup>-2</sup> ) | RMSE (g m <sup>-2</sup> ) | Coefficient of determination (R <sup>2</sup> ) |
|-----------|--------------------------|---------------------------|------------------------------------------------|
| RF        | 119.7975                 | 148.1414                  | 0.916044                                       |
| RF        | 110.2672                 | 143.6928                  | 0.898237                                       |
| RF        | 106.1645                 | 128.2284                  | 0.921452                                       |
| RF        | 100.1349                 | 122.8048                  | 0.921412                                       |
| RF        | 114.0916                 | 149.9142                  | 0.892765                                       |
| RF        | 107.7502                 | 133.5622                  | 0.919392                                       |
| RF        | 136.5886                 | 169.8279                  | 0.876284                                       |
| RF        | 100.7597                 | 119.4719                  | 0.942066                                       |
| RF        | 117.6463                 | 151.569                   | 0.884445                                       |
| RF        | 111.8181                 | 141.0908                  | 0.912701                                       |
| RF        | 111.1065                 | 139.9799                  | 0.909079                                       |
| RF        | 136.6951                 | 171.3069                  | 0.855634                                       |
| RF        | 104.9303                 | 133.872                   | 0.926967                                       |
| RF        | 118.5584                 | 143.4742                  | 0.906125                                       |
| RF        | 111.8948                 | 147.6642                  | 0.899771                                       |
| RF        | 102.8167                 | 133.2284                  | 0.916527                                       |
| RF        | 136.285                  | 164.3982                  | 0.871049                                       |
| RF        | 110.7273                 | 155.2275                  | 0.897836                                       |
| RF        | 105.2721                 | 125.9429                  | 0.930583                                       |
| RF        | 99.7785                  | 125.3235                  | 0.9298                                         |
| RF        | 107.0931                 | 137.8202                  | 0.902705                                       |
| RF        | 108.8778                 | 123.8896                  | 0.929514                                       |
| RF        | 100.4996                 | 125.6673                  | 0.935775                                       |
| RF        | 111.8781                 | 145.5287                  | 0.905015                                       |
| RF        | 127.3078                 | 167.4374                  | 0.876435                                       |
| RF        | 116.4748                 | 142.3661                  | 0.915979                                       |
| RF        | 110.5773                 | 147.9834                  | 0.901971                                       |
| RF        | 107.1008                 | 135.1511                  | 0.900116                                       |
| RF        | 95.47278                 | 130.8587                  | 0.921422                                       |
| RF        | 119.3775                 | 140.1423                  | 0.922016                                       |
| RF        | 115.9131                 | 146.6371                  | 0.905605                                       |
| RF        | 99.82979                 | 131.4242                  | 0.922448                                       |
| RF        | 103.365                  | 131.1631                  | 0.928199                                       |
| RF        | 134.2205                 | 162.0426                  | 0.879752                                       |
| RF        | 110.6957                 | 140.9505                  | 0.895337                                       |
| RF        | 115.0112                 | 151.9779                  | 0.87949                                        |
| RF        | 117.3989                 | 158.8426                  | 0.87588                                        |
| RF        | 114.9733                 | 148.3849                  | 0.902559                                       |

|     |          |          |          |
|-----|----------|----------|----------|
| RF  | 110.7049 | 129.3245 | 0.939484 |
| RF  | 107.2785 | 123.5176 | 0.928689 |
| RF  | 93.96014 | 116.238  | 0.92401  |
| RF  | 107.2756 | 137.4207 | 0.925565 |
| RF  | 100.7429 | 125.7191 | 0.934332 |
| RF  | 106.1249 | 127.1983 | 0.906393 |
| RF  | 139.2655 | 178.2483 | 0.874327 |
| RF  | 119.7131 | 161.2743 | 0.893249 |
| RF  | 111.7995 | 145.2406 | 0.902386 |
| RF  | 113.734  | 146.0043 | 0.896196 |
| RF  | 107.7184 | 132.2833 | 0.900077 |
| RF  | 105.6949 | 122.2875 | 0.947621 |
| RBF | 93.41103 | 111.7797 | 0.955225 |
| RBF | 85.39414 | 105.082  | 0.944757 |
| RBF | 90.18155 | 117.7106 | 0.934235 |
| RBF | 96.75184 | 113.9804 | 0.932339 |
| RBF | 101.2754 | 124.0534 | 0.928459 |
| RBF | 92.50441 | 107.5343 | 0.94863  |
| RBF | 92.11284 | 112.781  | 0.944444 |
| RBF | 91.78491 | 120.0431 | 0.940552 |
| RBF | 111.0718 | 129.6541 | 0.917957 |
| RBF | 91.79651 | 116.6371 | 0.944356 |
| RBF | 89.14871 | 109.7135 | 0.945941 |
| RBF | 103.2617 | 126.511  | 0.930062 |
| RBF | 85.02968 | 102.755  | 0.959404 |
| RBF | 94.90637 | 109.8189 | 0.951969 |
| RBF | 108.4197 | 137.7227 | 0.908208 |
| RBF | 91.10199 | 105.8473 | 0.948014 |
| RBF | 102.8248 | 121.6717 | 0.929701 |
| RBF | 92.63952 | 115.423  | 0.942842 |
| RBF | 101.0645 | 135.147  | 0.919571 |
| RBF | 89.66994 | 108.9033 | 0.94932  |
| RBF | 102.3873 | 126.6338 | 0.917349 |
| RBF | 99.13121 | 123.9217 | 0.930152 |
| RBF | 82.53234 | 96.3069  | 0.968263 |
| RBF | 88.80952 | 113.4791 | 0.942513 |
| RBF | 100.7627 | 120.4183 | 0.93747  |
| RBF | 107.001  | 132.0483 | 0.929261 |
| RBF | 96.08942 | 120.468  | 0.931921 |
| RBF | 91.81762 | 107.4533 | 0.936132 |
| RBF | 90.18858 | 115.8784 | 0.938099 |
| RBF | 82.88174 | 99.21514 | 0.962078 |
| RBF | 101.9572 | 132.5091 | 0.918576 |



|     |          |          |          |
|-----|----------|----------|----------|
| RBF | 92.25789 | 112.8294 | 0.940787 |
| RBF | 83.43907 | 98.93    | 0.959095 |
| RBF | 91.12766 | 107.1789 | 0.950698 |
| RBF | 100.9256 | 124.7097 | 0.919113 |
| RBF | 112.9048 | 134.8489 | 0.905831 |
| RBF | 91.7331  | 114.089  | 0.936687 |
| RBF | 86.9929  | 101.501  | 0.95771  |
| RBF | 96.0831  | 119.6358 | 0.948123 |
| RBF | 94.80073 | 113.9383 | 0.940324 |
| RBF | 94.31312 | 118.9435 | 0.919788 |
| RBF | 90.85541 | 109.2606 | 0.955173 |
| RBF | 93.25251 | 119.6226 | 0.940368 |
| RBF | 92.96258 | 110.9872 | 0.928293 |
| RBF | 106.8059 | 128.2234 | 0.941275 |
| RBF | 97.1596  | 131.7042 | 0.931538 |
| RBF | 91.41567 | 111.6411 | 0.942668 |
| RBF | 98.10604 | 118.6544 | 0.931507 |
| RBF | 94.0315  | 111.2507 | 0.928674 |
| RBF | 86.83321 | 101.8235 | 0.963055 |
| SVR | 94.51651 | 111.0089 | 0.956204 |
| SVR | 85.07574 | 102.711  | 0.948514 |
| SVR | 94.43239 | 114.0867 | 0.944061 |
| SVR | 93.3968  | 106.9398 | 0.945375 |
| SVR | 103.4971 | 119.4833 | 0.934489 |
| SVR | 101.4538 | 116.8256 | 0.939164 |
| SVR | 86.59942 | 103.3951 | 0.960111 |
| SVR | 98.85259 | 121.1884 | 0.939179 |
| SVR | 112.0184 | 129.8826 | 0.919976 |
| SVR | 84.17188 | 98.64961 | 0.962204 |
| SVR | 92.37943 | 114.9125 | 0.941388 |
| SVR | 97.06402 | 111.2485 | 0.943611 |
| SVR | 100.243  | 117.3712 | 0.945837 |
| SVR | 91.51115 | 107.2708 | 0.954769 |
| SVR | 98.83634 | 115.3385 | 0.9366   |
| SVR | 94.36231 | 107.5964 | 0.947994 |
| SVR | 104.8689 | 121.624  | 0.927531 |
| SVR | 92.11001 | 108.4468 | 0.948885 |
| SVR | 109.8608 | 129.485  | 0.924026 |
| SVR | 89.07842 | 106.8196 | 0.950056 |
| SVR | 103.1966 | 122.565  | 0.921943 |
| SVR | 99.622   | 112.3747 | 0.943951 |
| SVR | 92.36352 | 110.1389 | 0.957031 |
| SVR | 90.81369 | 107.6235 | 0.948475 |

|     |          |          |          |
|-----|----------|----------|----------|
| SVR | 105.0717 | 127.2379 | 0.931516 |
| SVR | 100.7682 | 115.0609 | 0.947694 |
| SVR | 91.94235 | 112.9972 | 0.94265  |
| SVR | 95.84098 | 108.0575 | 0.934759 |
| SVR | 95.55339 | 112.6115 | 0.942497 |
| SVR | 91.08859 | 109.7267 | 0.952543 |
| SVR | 92.61422 | 107.3912 | 0.947799 |
| SVR | 97.09481 | 115.4407 | 0.938544 |
| SVR | 90.89481 | 108.9887 | 0.949821 |
| SVR | 96.53723 | 112.7428 | 0.947326 |
| SVR | 94.41556 | 112.9802 | 0.934302 |
| SVR | 101.7897 | 121.7234 | 0.919102 |
| SVR | 87.64503 | 108.7332 | 0.94324  |
| SVR | 100.2869 | 113.4994 | 0.94792  |
| SVR | 89.21886 | 102.1397 | 0.963119 |
| SVR | 104.0221 | 118.7827 | 0.933476 |
| SVR | 93.67412 | 107.9619 | 0.934338 |
| SVR | 98.18517 | 115.7734 | 0.949085 |
| SVR | 99.43682 | 119.8233 | 0.947145 |
| SVR | 100.7466 | 119.1365 | 0.920744 |
| SVR | 110.8865 | 130.4639 | 0.934299 |
| SVR | 84.74723 | 99.74755 | 0.963307 |
| SVR | 100.5082 | 120.4548 | 0.934576 |
| SVR | 101.529  | 119.2003 | 0.935642 |
| SVR | 100.1418 | 110.516  | 0.931083 |
| SVR | 85.23452 | 103.0854 | 0.960316 |

---

Coefficient of determination ( $R^2$ ), the Root Mean Square Error (RMSE) and the Mean Absolute Errors (MAE)
